# Supplementary material
Source: PubMed Central journal article supplement (PMC2691436)
Supplement: supp_180_12_1207_v2_1.pdf [file supp_180_12_1207_v2_1.pdf]

## **Appendix 1: Participating hospitals in RO-STEMI**

### **Tertiary referral hospitals**

- Emergency “Floreasca” Hospital Bucharest
- University Emergency Hospital Bucharest
- Emergency “Bagdasar-Arseni” Hospital Bucharest
- “CC Iliescu “ Hospital Bucharest
- Center of Cardiology Cluj
- Center of Cardiology Iasi
- Center of Cardiology Timisoara

### **County hospitals**

- Arad Hospital
- Baia Mare Hospital
- Braila Hospital
- Colentina Hospital Bucharest
- Constanta Hospital
- Center of Cardiology Craiova
- Emergency “St Pantelimon” Hospital Bucharest
- Fagaras Hospital
- Galati Hospital
- Center of Cardiology Brasov
- Municipality Hospital Timisoara
- Oradea Hospital
- Pitesti Hospital
- Radauti Hospital
- Roman Hospital
- Ramnicu-Vilcea Hospital
- Sibiu Hospital
- “St Spiridon” Iasi Hospital
- Suceava Hospital
- Slatina Hospital
- Tirgoviste Hospital
