# Supplementary material
Source: PubMed Central journal article supplement (PMC2691436)

**Appendix 2:** Administrative map of Romania showing hospitals that participated in the Romanian Registry for ST-segment Elevation Myocardial Infarction Registry

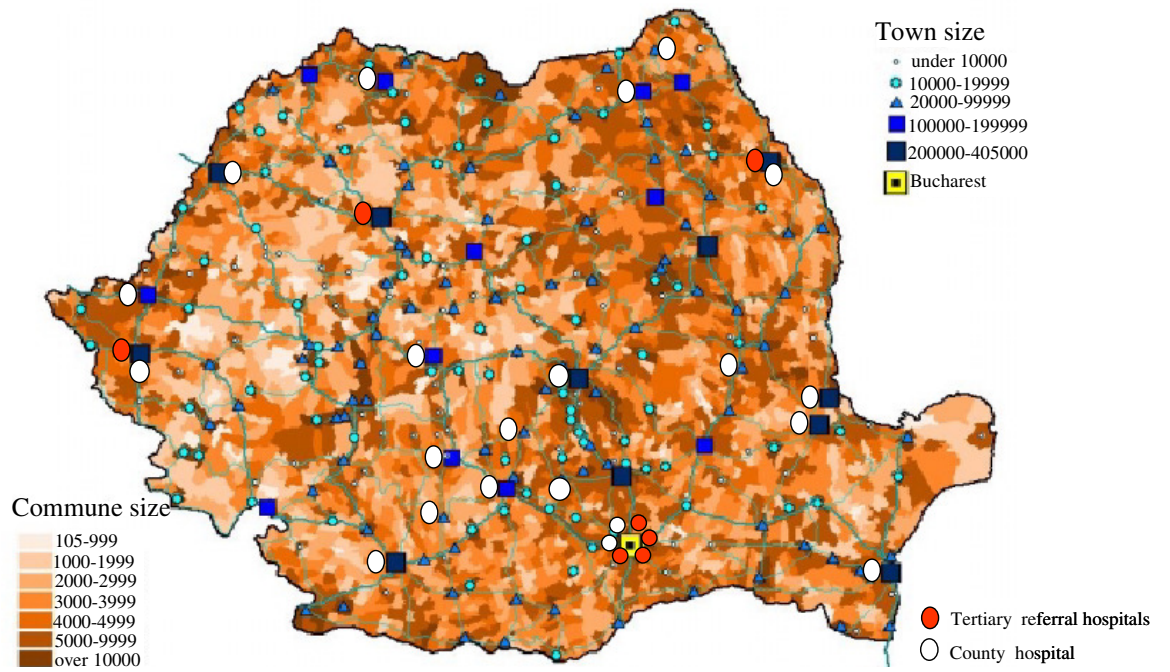

Supplement: supp_180_12_1207_v2_2.pdf [file supp_180_12_1207_v2_2.pdf]
